# Supplementary material for: Salmonid fish: model organisms to study cardiovascular morphogenesis in conjoined twins?
Source: Springer Nature journal article supplement (doi:10.1186/s12861-016-0125-x), 2016-07-15
Supplement: MOESM1 [file 12861_2016_125_MOESM1_ESM.pdf]

## SUPPLEMENTAL MATERIAL

### Genetic identification of the char-salmon twins using 109 biallelic SNPs isolated from Atlantic salmon.

Blank cell = no marker amplification.

Genetic markers correspond with Lien et al., 2011 genetic map.

Markers giving unreliable genotyping are marked with comment

Total number of usable markers = Ok = 72

Total number of usable markers with identical genotype junior and senior (72 = 100%)

| Genetic marker         | Junior muscle | Senior Liver | Senior Muscle | Senior Heart | Comment            |
|------------------------|---------------|--------------|---------------|--------------|--------------------|
| BASS117_B7_F06_677     | CC            | CC           | CC            | CC           | OK                 |
| ESTNV_20218_62         | CC            | CC           | CC            | CC           | OK                 |
| ESTNV_21396_116        | CC            | CC           | CC            | CC           | OK                 |
| ESTNV_25066_386        | TT            | TT           | TT            | TT           | OK                 |
| ESTNV_25207_614        | CC            | CC           | CC            | CC           | OK                 |
| ESTNV_31779_190        | CT            | CT           | CT            | CT           | OK                 |
| ESTNV_33205_897        | AG            |              | AG            |              | OK                 |
| ESTNV_35065_572        | CC            | CC           | CC            | CC           | OK                 |
| ESTNV_36651_1364       | GG            | GG           |               | GG           | OK                 |
| ESTV_18140_753         | CC            | CC           | CC            | CC           | OK                 |
| ESTV_20442_1276        | CC            | CC           | CC            | CC           | OK                 |
| GCR_cBin10506_Ctg1_377 | AA            | AA           | AA            | AA           | OK                 |
| GCR_cBin10764_Ctg1_187 | AA            | AA           |               | AA           | OK                 |
| GCR_cBin15290_Ctg1_216 | CC            | CC           | CC            | CC           | OK                 |
| GCR_cBin1608_Ctg1_208  | CT            | CT           | CT            | CT           | OK                 |
| GCR_cBin207_Ctg1_149   | AA            | AA           | AA            | AA           | OK                 |
| GCR_cBin20876_Ctg1_29  | CC            | CC           | CC            | CC           | OK                 |
| GCR_cBin25731_Ctg1_87  |               |              | CC            |              | Poor amplification |
| GCR_cBin30435_Ctg1_161 |               |              |               |              | Poor amplification |
| GCR_cBin39106_Ctg1_120 | TT            | TT           | TT            | TT           | OK                 |
| GCR_cBin40838_Ctg1_52  | AA            | AA           | AA            | AA           | OK                 |
| GCR_cBin49296_Ctg1_187 | GG            | GG           | GG            | GG           | OK                 |

|                        |    |    |    |    |                    |
|------------------------|----|----|----|----|--------------------|
| GCR_cBin49589_Ctg1_81  | TT | TT | TT | TT | OK                 |
| GCR_cBin501_Ctg1_254   |    |    |    |    | Poor amplification |
| GCR_cBin7278_Ctg1_140  | GG | GG | GG | GG | OK                 |
| GCR_hBin1984_Ctg1_131  | AC | AC | AC | AC | OK                 |
| BASS14_B7_H10_429      | CC | CC | CC | CC | OK                 |
| ESTNV_22696_678        | TT | TT | TT | TT | OK                 |
| ESTNV_23861_220        | CC | CC | CC | CC | OK                 |
| ESTNV_29410_233        | CC | CC | CC | CC | OK                 |
| ESTNV_30996_234        | GG | GG | GG | GG | OK                 |
| ESTNV_33016_564        | AA | AA |    | AA | OK                 |
| ESTNV_33128_565        | AA | AA | AA | AA | OK                 |
| ESTNV_36072_124        | GG | GG | GG | GG | OK                 |
| ESTV_14782_767         | GG | GG |    | GG | OK                 |
| ESTV_16103_649         |    |    |    |    | Poor amplification |
| ESTV_16688_280         | AG | AG | AG | AG | OK                 |
| ESTV_16913_418         | TT | TT | TT | TT | OK                 |
| GCR_cBin13730_Ctg1_588 |    |    |    |    | Poor amplification |
| GCR_cBin14803_Ctg1_153 | AA | AA | AA | AA | OK                 |
| GCR_cBin18802_Ctg1_133 | TT | TT | TT | TT | OK                 |
| GCR_cBin19498_Ctg1_386 | AA |    | AA | AA | OK                 |
| GCR_cBin2349_Ctg1_433  | CG | CG |    | CG | OK                 |
| GCR_cBin2393_Ctg1_311  | TT | TT | TT | TT | OK                 |
| GCR_cBin25356_Ctg1_418 | AA | AA | AA | AA | OK                 |
| GCR_cBin27805_Ctg1_63  |    | GT |    |    | Poor amplification |
| GCR_cBin34406_Ctg1_88  | CC | CC |    | CC | OK                 |
| GCR_cBin36544_Ctg1_139 | CC | CC | CC | CC | OK                 |
| GCR_cBin39236_Ctg1_56  | GG | GG |    | GG | OK                 |
| GCR_cBin466_Ctg1_234   | GG | GG | GG | GG | OK                 |
| GCR_cBin5664_Ctg1_209  | CC | CC | CC | CC | OK                 |
| GCR_cBin6507_Ctg1_263  | AA | AA | AA | AA | OK                 |
| GCR_cBin760_Ctg1_479   |    |    |    |    | Poor amplification |
| GCR_cBin774_Ctg1_544   | GG | GG | GG | GG | OK                 |
| GCR_cBin8161_Ctg1_218  | GG | GG | GG | GG | OK                 |

|                        |    |    |    |    |                       |
|------------------------|----|----|----|----|-----------------------|
| GCR_cBin9358_Ctg1_120  | AA | AA | AA | AA | OK                    |
| GCR_hBin27289_Ctg1_90  | TT | TT | TT | TT | OK                    |
| ESTNV_21223_122        | TT | TT | TT | TT | OK                    |
| ESTNV_22734_289        | CC | CC | CC | CC | OK                    |
| ESTNV_29299_371        |    |    |    |    | Poor amplification    |
| ESTNV_32516_218        | CC | CC | CC | CC | OK                    |
| ESTNV_33917_998        |    |    |    |    | Poor amplification    |
| ESTNV_34451_135        | AA | AA | AA | AA | OK                    |
| ESTNV_34935_1675       | CC | CC | CC | CC | OK                    |
| GCR_cBin10758_Ctg1_395 |    |    |    |    | Poor amplification    |
| GCR_cBin10801_Ctg1_300 |    |    | TT |    | Poor amplification    |
| GCR_cBin11286_Ctg1_158 | GG | GG | GG | GG | OK                    |
| GCR_cBin11714_Ctg1_79  | CT | CT | CT | CT | OK                    |
| GCR_cBin1188_Ctg1_179  | AA | AA | AC | AA | Unreliable clustering |
| GCR_cBin17416_Ctg1_223 | TT | TT | TT | TT | OK                    |
| GCR_cBin23187_Ctg1_181 | GG | GG | GG | GG | OK                    |
| GCR_cBin24202_Ctg1_90  | CC | CC | CC | CC | OK                    |
| GCR_cBin25832_Ctg1_468 | GG | GG | GG | GG | OK                    |
| GCR_cBin32185_Ctg1_72  | AA | AA | AA | AA | OK                    |
| GCR_cBin33206_Ctg1_109 | TT | TT | TT | TT | OK                    |
| GCR_cBin41047_Ctg1_75  | GG | GG | GG | GG | OK                    |
| GCR_cBin43612_Ctg1_147 | CC | CC | CC | CC | OK                    |
| GCR_cBin4585_Ctg1_148  | AA | AA | AA | AA | OK                    |
| GCR_cBin48621_Ctg1_146 |    |    | CT |    | Poor amplification    |
| GCR_cBin4944_Ctg1_147  | CC | CC | CC | CC | OK                    |
| GCR_cBin50954_Ctg1_86  | GG | GG | GG | GG | OK                    |
| GCR_cBin51554_Ctg1_52  | TT | TT | TT | TT | OK                    |
| GCR_cBin5440_Ctg1_39   | AA | AA | AA | AA | OK                    |
| GCR_cBin6469_Ctg1_121  | AA | AA | AA | AA | OK                    |
| GCR_hBin16337_Ctg1_198 | GG | GG | GG | GG | OK                    |
| ESTNV_16657_595        |    | AA | AA | AA | Poor amplification    |
| ESTNV_23285_157        |    | CC | CC | CC | Poor amplification    |
| ESTNV_28366_1826       |    | GG | GG | GG | Poor amplification    |

|                        |    |    |    |    |                       |
|------------------------|----|----|----|----|-----------------------|
| ESTNV_30562_773        |    | CT | CT | CT | Poor amplification    |
| ESTNV_33266_651        |    |    |    |    | Poor amplification    |
| ESTNV_34453_617        |    | AA | AA | AA | Poor amplification    |
| ESTNV_34663_147        |    |    |    |    | Poor amplification    |
| ESTNV_35432_2607       |    | AA |    | AA | Poor amplification    |
| ESTNV_36751_1595       |    | CC | CC | CC | Poor amplification    |
| ESTNV_36856_820        |    | AA | AA | AA | Poor amplification    |
| ESTNV_37138_2049       |    | TT | TT | TT | Poor amplification    |
| ESTV_16609_285         |    | GG |    | GG | Poor amplification    |
| ESTV_16691_375         |    | CC | CC | CC | Poor amplification    |
| ESTV_17632_161         |    |    |    |    | Poor amplification    |
| GCR_cBin12293_Ctg1_225 |    | TT | TT | TT | Poor amplification    |
| GCR_cBin13678_Ctg1_110 | AA | TT | AT | TT | Unreliable clustering |
| GCR_cBin14116_Ctg1_119 |    | GG | GG | GG | Poor amplification    |
| GCR_cBin28606_Ctg1_136 |    | GG | GG | GG | Poor amplification    |
| GCR_cBin33614_Ctg1_90  |    | GG | GG | GG | Poor amplification    |
| GCR_cBin34474_Ctg1_164 |    | CC | CC | CC | Poor amplification    |
| GCR_cBin37713_Ctg1_64  |    | CC |    | CC | Poor amplification    |
| GCR_cBin38161_Ctg1_138 |    | GG | GG | GG | Poor amplification    |
| GCR_cBin44616_Ctg1_312 |    | CC | CC | CC | Poor amplification    |
| GCR_cBin6366_Ctg1_223  |    | TT | TT | TT | Poor amplification    |

### Genetic identification of the Atlantic salmon twins using 18 polymorphic microsatellite DNA loci

Blank cell = no marker amplification.

Total number of usable markers with identical genotype siamese twin 1: 17 (100% similar)

Total number of usable markers with identical genotype siamese twin 2: 18 (100% similar)

| Sample | Siamese twins 1a (34-21) | Siamese twin 1b (34-22) | Siamese twin 2a (39-2) | Siamese twin 2b (39-3) | Comment |
|--------|--------------------------|-------------------------|------------------------|------------------------|---------|
| MHC1-a | 164                      | 164                     | 146                    | 146                    | OK      |
| MHC1-b | 164                      | 164                     | 148                    | 148                    | OK      |
| MHC2-a | 210                      | 210                     | 260                    | 260                    | OK      |

|            |     |     |     |     |                    |
|------------|-----|-----|-----|-----|--------------------|
| MHC2-b     | 260 | 260 | 360 | 360 | OK                 |
| SSsp2201-a | 295 | 295 | 251 | 251 | OK                 |
| SSsp2201-b | 295 | 295 | 295 | 295 | OK                 |
| SSsp2210-a | 124 | 124 | 124 | 124 | OK                 |
| SSsp2210-b | 152 | 152 | 132 | 132 | OK                 |
| SSsp3016-a | 90  | 90  | 98  | 98  | OK                 |
| SSsp3016-b | 102 | 102 | 102 | 102 | OK                 |
| SSspG7-a   | 127 | 127 | 143 | 143 | OK                 |
| SSspG7-b   | 143 | 143 | 179 | 179 | OK                 |
| Sp1605-a   | 224 | 224 | 224 | 224 | OK                 |
| Sp1605-b   | 249 | 249 | 244 | 244 | OK                 |
| Sp2216-a   | 222 | 222 | 226 | 226 | OK                 |
| Sp2216-b   | 226 | 226 | 230 | 230 | OK                 |
| SsOsl85-a  | 193 | 193 | 187 | 187 | OK                 |
| SsOsl85-b  | 197 | 197 | 187 | 187 | OK                 |
| Ssa14-a    | 140 | 140 | 140 | 140 | OK                 |
| Ssa14-b    | 140 | 140 | 140 | 140 | OK                 |
| Ssa171-a   |     |     | 217 | 217 | Poor amplification |
| Ssa171-b   |     |     | 221 | 221 | Poor amplification |
| Ssa197-a   | 176 | 176 | 180 | 180 | OK                 |
| Ssa197-b   | 196 | 196 | 188 | 188 | OK                 |
| Ssa202-a   | 242 | 242 | 238 | 238 | OK                 |
| Ssa202-b   | 254 | 254 | 258 | 258 | OK                 |
| Ssa289-a   | 112 | 112 | 112 | 112 | OK                 |
| Ssa289-b   | 128 | 128 | 118 | 118 | OK                 |
| SsaD144-a  | 162 | 162 | 122 | 122 | OK                 |
| SsaD144-b  | 166 | 166 | 162 | 162 | OK                 |
| SsaD157-a  | 343 | 343 | 311 | 311 | OK                 |
| SsaD157-b  | 363 | 363 | 339 | 339 | OK                 |
| SsaD486-a  | 172 | 172 | 172 | 172 | OK                 |
| SsaD486-b  | 172 | 172 | 172 | 172 | OK                 |
| SsaF43-a   | 115 | 115 | 103 | 103 | OK                 |
| SsaF43-b   | 115 | 115 | 115 | 115 | OK                 |
